# Supplementary material for: Systemic Diseases and Biological Dental Implant Complications: A Narrative Review
Source: MDPI journal article supplement (doi:10.3390/dj11010010), 2022-12-29
Supplement: s1 [file s1]

## SUPPLEMENTARY MATERIALS

**Table S1.** Twenty prospective studies retrieved from the electronic database search

|   | TITLE                                                                                                                                                                                              | AUTHOR                           | YEAR | TYPE OF STUDY                              | JOURNAL                                                 | RISK FACTORS                                       |
|---|----------------------------------------------------------------------------------------------------------------------------------------------------------------------------------------------------|----------------------------------|------|--------------------------------------------|---------------------------------------------------------|----------------------------------------------------|
| 1 | Clinical performance of titanium-zirconium implants with a hydrophilic surface in patients with controlled type 2 diabetes mellitus: 2-year results from a prospective case-control clinical study | José J. Cabrera-Domínguez et al. | 2019 | Prospective case-control clinical study    | Clin Oral Investig                                      | Diabetes                                           |
| 2 | Peri-implant soft tissue status and crestal bone levels around adjacent implants placed in patients with and without type-2 diabetes mellitus: 6 years follow-up results                           | Mohammed N. Alasqah et al.       | 2018 | Prospective clinical study                 | J Periodontol.                                          | Diabetes                                           |
| 3 | A Prospective, Controlled, Multicenter Study to Evaluate the Clinical Outcome of Implant Treatment in Women with Osteoporosis/Osteopenia: 5-Year Results                                           | A. Temmerman et al.              | 2019 | Prospective, Controlled, Multicenter study | J Dent Res                                              | Osteoporosis                                       |
| 4 | Assessment of early and late implantation failure of teeth: A single center experience with 297 implanted teeth                                                                                    | Haydar Munil Salih et al.        | 2021 | Prospective, Single center study           | AVFT Archivos Venezolanos de Farmacología y Terapéutica | Diabetes                                           |
| 5 | Association of Systemic Conditions with Dental Implant Failures in 6,384 Patients During a 31-Year Follow-up Period                                                                                | Alan B. Carr et al.              | 2017 | Prospective study                          | Int J Oral Maxillofac Implant                           | Cardiovascular disease<br>Osteoporosis<br>Diabetes |
| 6 | Bone stability around implants in elderly patients with reduced bone mineral density – a prospective study on mandibular overdentures                                                              | Luke Chow et al.                 | 2016 | Prospective study                          | Clin Oral Implants Res                                  | Osteoporosis                                       |
| 7 | Comparison of clinical and radiographic peri-implant parameters among obese and non-obese patients: A 5-year study                                                                                 | Fahad Alkhudhairi et al.         | 2018 | Longitudinal study                         | Clin Implant Dent Relat Res                             | Obesity                                            |
| 8 | Implant health and factors affecting peri-implant marginal bone alteration for implants placed in staged maxillary sinus augmentation: A 5-year prospective study                                  | Stefan Krennmair et al.          | 2019 | Prospective study                          | Clin Implant Dent Relat Res.                            | Diabetes                                           |
|   | Dental implants treatment outcomes in patient under active therapy with alendronate: 3-year                                                                                                        | Marco Tallarico et al.           | 2016 | Prospective observational study            | Clin Oral Implants Res                                  | Osteoporosis                                       |

|    |                                                                                                                                                                                                                           |                                |      |                                                                  |                               |                                                   |
|----|---------------------------------------------------------------------------------------------------------------------------------------------------------------------------------------------------------------------------|--------------------------------|------|------------------------------------------------------------------|-------------------------------|---------------------------------------------------|
| 9  | follow-up results of a multicenter prospective observational study                                                                                                                                                        |                                |      |                                                                  |                               | Alendronate                                       |
| 10 | An open, prospective, non-randomized, controlled, multicentre study to evaluate the clinical outcome of implant treatment in women over 60 years of age with osteoporosis/osteopenia: 1-year results                      | Andy Temmerman et al.          | 2016 | Open, prospective, non-randomized, controlled, multicentre study | Clin Oral Implants Res        | Osteopenia<br>Osteoporosis                        |
| 11 | Dental implant survival and complication rate over two years for individuals with poorly controlled type 2 diabetes mellitus                                                                                              | Caroline C Eskow et al.        | 2017 | Observational study                                              | Clin Implant Dent Relat Res   | Diabetes                                          |
| 12 | Factors affecting peri-implant bone resorption in four Implant supported mandibular full-arch restorations: a 3-year prospective study                                                                                    | Krennmair S. et al.            | 2016 | Prospective study                                                | J Clin Periodontol            | Diabetes<br>Cardiovascular disease                |
| 13 | Association of Dental Implants Success in Bone Density Classification of Postmenopausal Women with Osteoporosis – A Clinical and Radiographic Prospective Study                                                           | Wasim Alsadi et al.            | 2021 | Prospective clinical study                                       | J Indian Acad Oral Med Radiol | Osteoporosis                                      |
| 14 | Clinical performance of hydrophilic, titanium-zirconium dental implants in patients with well-controlled and poorly controlled type 2 diabetes: 1-Year results of a dual-center cohort study                              | Jessica M. Latimer et al.      | 2021 | Dual-center, prospective cohort study                            | J Periodontol                 | Poorly controlled diabetes<br>Controlled diabetes |
| 15 | Prevalence of periodontitis, dental caries, and peri-implant pathology and their relation with systemic status and smoking habits: Results of an open-cohort study with 22009 patients in a private rehabilitation center | Miguel de Ara'ujo Nobre et al. | 2017 | Prospective open-cohort study                                    | J Dent                        | Diabetes<br>Cardiovascular disease                |
| 16 | Stability and bone loss around submerged and non-submerged implants in diabetic and non-diabetic patients: a 7-year follow-up                                                                                             | Saeed AL ZAHRAANI et al.       | 2018 | Prospective observational study                                  | Braz Oral Res                 | Diabetes                                          |
| 17 | One-year performance of posterior narrow diameter implants in hyperglycemic and normo-glycemic patients—a pilot study                                                                                                     | Anton Friedmann et al.         | 2021 | Pilot study                                                      | Clin Oral Investig            | Hyperglycemia                                     |

|    |                                                                                                                                                                                        |                            |      |                                      |                             |                            |
|----|----------------------------------------------------------------------------------------------------------------------------------------------------------------------------------------|----------------------------|------|--------------------------------------|-----------------------------|----------------------------|
| 18 | Immediate implant-prosthetic dental rehabilitation of patients with diabetes using four immediately loaded dental implants: a pilot study                                              | Raluca-Iulia Juncar et al. | 2020 | Prospective Clinical Research Report | J Int Med Res               | Diabetes                   |
| 19 | Comparison of clinical peri-implant indices and crestal bone levels around narrow and regular diameter implants placed in diabetic and non-diabetic patients: A 3-year follow-up study | Nouf Al-Shibani et al.     | 2019 | Retrospective study                  | Clin Implant Dent Relat Res | Diabetes                   |
| 20 | Crestal Bone Loss Around Submerged and Non-Submerged Dental Implants in Individuals with Type-2 Diabetes Mellitus: A 7-Year Prospective Clinical Study                                 | Al Zahrani et al.          | 2019 | Prospective study                    | Med Princ Pract             | Poorly controlled diabetes |

**Table S2.** Thirty-two retrospective studies retrieved from the electronic database search

|   | TITLE                                                                                                                                                                                                | AUTHOR                      | YEAR | TYPE OF STUDY                     | JOURNAL                        | RISK FACTORS            |
|---|------------------------------------------------------------------------------------------------------------------------------------------------------------------------------------------------------|-----------------------------|------|-----------------------------------|--------------------------------|-------------------------|
| 1 | Clinical and radiographic indices around narrow diameter implants placed in different glycemic-level patients                                                                                        | Abdulaziz Alsahhaf et al.   | 2019 | Retrospective study               | Clin Implant Dent Relat Res    | Prediabetes<br>Diabetes |
| 2 | Comparison of clinical peri-implant indices and crestal bone levels around narrow and regular diameter implants placed in diabetic and non-diabetic patients: A 3-year follow-up study               | Nouf Al-Shibani et al.      | 2019 | Retrospective study               | Clin Implant Dent Relat Res    | Diabetes                |
| 3 | Clinical, radiographic, and restorative peri-implant measurements of narrow and standard diameter implants in obese and nonobese patients: A 3-year retrospective follow-up study                    | Ibraheem F. Alshiddi et al. | 2019 | Retrospective study               | Clin Implant Dent Relat Res    | Obesity                 |
| 4 | Comparison of Preprosthetic Implant Complications and Failures Between Obese and Nonobese Patients                                                                                                   | Abdel Azeem Hazem et al.    | 2016 | Retrospective study               | Int J Oral Maxillofac Implants | Obesity                 |
| 5 | Clinical and Radiographic Peri-Implant Parameters and Whole Salivary Interleukin-1 $\beta$ and Interleukin-6 Levels among Type-2 Diabetic and Nondiabetic Patients with and without Peri-Implantitis | Mansour Al-Askar et al.     | 2018 | Retrospective observational study | Med Princ Pract                | Diabetes                |
|   | Comparison of peri-implant soft tissue and crestal bone status of dental implants placed in prediabetic, type 2 diabetic,                                                                            | Abdullah Alshahrani et al.  | 2020 | Retrospective cohort study        | Int J Implant Dent             | Diabetes                |

|    |                                                                                                                                                                                      |                                 |      |                                  |                                                             |                                  |
|----|--------------------------------------------------------------------------------------------------------------------------------------------------------------------------------------|---------------------------------|------|----------------------------------|-------------------------------------------------------------|----------------------------------|
| 6  | and non-diabetic individuals: a retrospective cohort study                                                                                                                           |                                 |      |                                  |                                                             |                                  |
| 7  | Dental Implants with a Calcium Ions-Modified Surface and Platelet Concentrates for the Rehabilitation of Medically Compromised Patients: A Retrospective Study with 5-Year Follow-Up | Marco Mozzati et al.            | 2021 | Retrospective study              | Materials (Basel)                                           | Diabetes<br>Osteoporosis         |
| 8  | Effects of anti-resorptive drugs on implant survival and peri-implantitis in patients with existing osseointegrated dental implants: a retrospective cohort study                    | J.Y. Kim et al.                 | 2020 | Retrospective cohort study       | Osteoporos Int                                              | Antiresorptive drugs<br>Diabetes |
| 9  | Evaluation of Long-Term Dental Implant Success and Marginal Bone Loss in Postmenopausal Women                                                                                        | VE Toy et al.                   | 2020 | Retrospective study              | Niger J Clin Pract                                          | Osteoporosis                     |
| 10 | Extensive Autogenous Bone Augmentation and Implantation in Patients Under Bisphosphonate Treatment: A 15-Case Series                                                                 | Fouad Khoury et al.             | 2016 | Case series                      | Int J Periodontics Restorative Dent                         | Bisphosphonates                  |
| 11 | Retrospective Study Of Dental Implants Survival Rate In Postmenopausal Women With Osteoporosis                                                                                       | Wasim Alsaadi et al.            | 2021 | Retrospective study              | International Journal of Dentistry and Oral Science (IJDOS) | Osteoporosis                     |
| 12 | Influence of Diabetes on Implant Failure and Peri-Implant Diseases: A Retrospective Study                                                                                            | Alice Alberti et al.            | 2020 | Retrospective study              | Dent J (Basel)                                              | Diabetes                         |
| 13 | Dental implants in diabetic patients: retrospective cohort study reporting on implant survival and risk indicators for excessive marginal bone loss at 5 years                       | M. DE ARAUJO NOBRE et al.       | 2016 | Retrospective cohort study       | J Oral Rehabil                                              | Diabetes                         |
| 14 | Relationship Between Osteoporosis and Marginal Bone Loss in Osseointegrated Implants: A 2-Year Retrospective Study                                                                   | Jose' R. Corcuera-Flores et al. | 2016 | Retrospective study              | J Periodontol                                               | Osteoporosis                     |
| 15 | Risk indicators for marginal bone resorption around implants in function for at least 4 years: A retrospective longitudinal study                                                    | Tomoaki Mameno et al.           | 2020 | Retrospective longitudinal study | J Periodontol                                               | Diabetes<br>Osteoporosis         |

|    |                                                                                                                                                                   |                                 |      |                                   |                                 |                                                    |
|----|-------------------------------------------------------------------------------------------------------------------------------------------------------------------|---------------------------------|------|-----------------------------------|---------------------------------|----------------------------------------------------|
| 16 | Association between peri-implantitis and cardiovascular diseases: A case-control study                                                                            | I-Ching Wang et al.             | 2022 | Case control study                | J Periodontol                   | Cardiovascular disease                             |
| 17 | Risk Factors for Implant Failure and Peri-Implant Pathology in Systemic Compromised Patients                                                                      | Joana Neves et al.              | 2016 | Retrospective clinical study      | J Prosthodont                   | Diabetes<br>Cardiovascular disease                 |
| 18 | Variables Affecting Peri-Implant Radiographic Bone Loss-8-23 Years Follow-Up                                                                                      | Michael Saminsky et al.         | 2020 | Retrospective observational study | Appl. Sci.                      | Osteoporosis<br>Diabetes<br>Cardiovascular disease |
| 19 | Intricate Assessment and Evaluation of Dental Implants in Patients on Bisphosphonate Therapy: A Retrospective Analysis                                            | Suraj Suvarna et al.            | 2016 | Retrospective study               | J Contemp Dent Pract            | Bisphosphonates                                    |
| 20 | Potential risk factors for early and late dental implant failure: a retrospective clinical study on 9080 implants                                                 | Henning Staedt et al.           | 2020 | Retrospective clinical study      | Int J Implant Dent              | Diabetes<br>Cardiovascular disease                 |
| 21 | Retrospective cohort study of 4,591 dental implants: Analysis of risk indicators for bone loss and prevalence of peri-implant mucositis and peri-implantitis      | David French et al.             | 2019 | Retrospective cohort study        | J Periodontol                   | Diabetes<br>Bisphosphonates                        |
| 22 | Long term clinical performance of 10 871 dental implants with up to 22 years of follow-up: A cohort study in 4247 patients                                        | David French et al.             | 2021 | Retrospective cohort study        | Clin Implant Dent Relat Res     | Diabetes                                           |
| 23 | The Effect of Controlled Diabetes and Hyperglycemia on Implant Placement with Simultaneous Horizontal Guided Bone Regeneration: A Clinical Retrospective Analysis | Paolo De Angelis et al.         | 2021 | Clinical retrospective study      | Biomed Res Int                  | Diabetes                                           |
| 24 | The Effect of Moderately Controlled Type 2 Diabetes on Dental Implant Survival and Peri-implant Bone Loss: A Long-Term Retrospective Study                        | Zeev Ormianer et al.            | 2018 | Retrospective study               | Int J Oral Maxillofac Implants  | Diabetes                                           |
| 25 | Risk factors associated with short dental implant success: a long-term retrospective evaluation of patients followed up for up to 9 years                         | HASANOGLU ERBASAR et al.        | 2019 | Multicenter retrospective study   | Braz Oral Res                   | Diabetes type I and II<br>Hypertension             |
| 26 | Comparative Evaluation of Dental Implant Failure among Healthy and Well-Controlled Diabetic Patients—A 3-Year Retrospective Study                                 | Mohammed Ghazi Sghaireen et al. | 2020 | Retrospective study               | Int J Environ Res Public Health | Diabetes                                           |

|    |                                                                                                                                                                 |                              |      |                                      |                                     |                                                             |
|----|-----------------------------------------------------------------------------------------------------------------------------------------------------------------|------------------------------|------|--------------------------------------|-------------------------------------|-------------------------------------------------------------|
| 27 | An 11-Year Retrospective Research Study of the Predictive Factors of Peri-Implantitis and Implant Failure: Analytic-Multicentric Study of 1279 Implants in Peru | Frank Mayta-Tovalino et al.  | 2019 | Retrospective multicentric study     | Int J Dent                          | Hypertension<br>Osteoporosis<br>Bisphosphonates<br>Diabetes |
| 28 | 7-mm-long dental implants: retrospective clinical outcomes in medically compromised patients                                                                    | Truc Thi Hoang Nguyen et al. | 2019 | Retrospective study                  | J Korean Assoc Oral Maxillofac Surg | Diabetes<br>Hypertension                                    |
| 29 | A 10 years retrospective study of assessment of prevalence and risk factors of dental implants failures                                                         | Rohit Singh et al.           | 2020 | Retrospective study                  | J Family Med Prim Care              | Diabetes<br>Hypertension<br>Cardiovascular disease          |
| 30 | Assessment of failure rate of dental implants in medically compromised patients                                                                                 | Anuj Singh Parihar et al.    | 2020 | Retrospective study                  | J Family Med Prim Care              | Diabetes<br>Osteoporosis<br>Cardiovascular disease          |
| 31 | Dental implants in medically complex patients—a retrospective study                                                                                             | Yifat Manor et al.           | 2016 | Retrospective cohort study           | Clin Oral Investig                  | Diabetes<br>Osteoporosis<br>Cardiovascular disease          |
| 32 | Implant-Supported Immediately Loaded Fixed Full-Arch Dentures: Evaluation of Implant Survival Rates in a Case Cohort of up to 7 Years                           | Robert Niedermaier et al.    | 2017 | Retrospective 7-years clinical trial | Clin Implant Dent Relat Res         | Diabetes<br>Cardiovascular disease<br>Osteoporosis          |

**Table S3.** Thirteen cross-sectional studies retrieved from the electronic database search

|   | TITLE                                                                                                                                                | AUTHOR                     | YEAR | TYPE OF STUDY                  | JOURNAL                     | RISK FACTORS             |
|---|------------------------------------------------------------------------------------------------------------------------------------------------------|----------------------------|------|--------------------------------|-----------------------------|--------------------------|
| 1 | Survival of adjacent-dental-implants in prediabetic and systemically healthy subjects at 5-years follow-up                                           | Mohammed Alrabiah et al.   | 2018 | Cross-sectional clinical study | Clin Implant Dent Relat Res | Prediabetes              |
| 2 | The Crucial Role of Plaque Control in Peri-Implant Mucositis Initiation as Opposed to the Role of Systemic Health Condition: A Cross-Sectional Study | Ali Raad AbdulAzeez et al. | 2021 | Cross-sectional study          | Clin Cosmet Investig Dent   | Diabetes<br>Hypertension |

|    |                                                                                                                                                                                          |                             |      |                                          |                             |                                                    |
|----|------------------------------------------------------------------------------------------------------------------------------------------------------------------------------------------|-----------------------------|------|------------------------------------------|-----------------------------|----------------------------------------------------|
|    |                                                                                                                                                                                          |                             |      |                                          |                             |                                                    |
| 3  | Prevalence and risk indicators of peri-implant diseases in a group of Moroccan patients                                                                                                  | Jamila Kissa et al.         | 2020 | Cross-sectional study                    | J Periodontol               | Diabetes<br>Cardiovascular disease<br>Hypertension |
| 4  | Peri-implant conditions and levels of advanced glycation end products among patients with different glycemic control                                                                     | Zeyad H. Al-Sowygh et al.   | 2018 | Cross-sectional retrospective study      | Clin Implant Dent Relat Res | Diabetes                                           |
| 5  | Prevalence of peri-implant diseases among an Italian population of patients with metabolic syndrome: A cross-sectional study                                                             | Piero Papi et al.           | 2019 | Cross-sectional study                    | J Periodontol               | Metabolic syndrome                                 |
| 6  | Comparison of clinical and radiographic status around immediately loaded versus conventional loaded implants placed in patients with type 2 Diabetes: 12- and 24-month follow-up results | M. D. AL AMRI et al.        | 2017 | Cross-sectional study                    | J Oral Rehabil              | Diabetes                                           |
| 7  | Influence of implant location in patients with and without type 2 Diabetes mellitus: 2-year follow-up                                                                                    | T. Abduljabbar et al.       | 2017 | Cross-sectional and retrospective design | Int J Oral Maxillofac Surg  | Diabetes                                           |
| 8  | Risk indicators for Peri-implantitis. A cross-sectional study with 916 implants                                                                                                          | Haline Renata Dalago et al. | 2017 | Cross-sectional study                    | Clin Oral Implants Res      | Diabetes<br>Cardiovascular disease<br>Hypertension |
| 9  | Association of advanced glycation end products with peri-implant inflammation in preDiabetes and type 2 Diabetes mellitus patients                                                       | Mohammed Alrabiah et al.    | 2018 | Cross-sectional case-control study       | Clin Implant Dent Relat Res | Prediabetes<br>Diabetes                            |
| 10 | Clinical and radiographic peri-implant variables around short dental implants in type 2 diabetic, prediabetic, and non-diabetic patients                                                 | Sameer Mokeem et al.        | 2019 | Retrospective cross-sectional study      | Clin Implant Dent Relat Res | Bisphosphonates<br>Diabetes                        |
| 11 | Comparison of peri-implant clinical and radiographic inflammatory parameters and whole salivary destructive inflammatory cytokine profile among obese and non-obese men.                 | Tariq Abduljabbar et al.    | 2016 | Cross-sectional retrospective study      | Cytokine                    | Obesity                                            |
| 12 | Peri-implant parameters and C-reactive protein levels among patients with different obesity levels                                                                                       | Fahim Vohrar et al.         | 2018 | Cross-sectional retrospective study      | Clin Implant Dent Relat Res | Obesity                                            |
| 13 | Clinical indices and local levels of inflammatory biomarkers in peri-implant health of obese and nonobese individuals                                                                    | Mohammed N. Alasqah et al.  | 2018 | Clinico-laboratory study                 | Clin Implant Dent Relat Res | Obesity                                            |

**Table S4.** Five not specified studies retrieved from the electronic database search

|   | TITLE                                                                                                                                                                                                                   | AUTHOR                     | YEAR | TYPE OF STUDY | JOURNAL                | RISK FACTORS            |
|---|-------------------------------------------------------------------------------------------------------------------------------------------------------------------------------------------------------------------------|----------------------------|------|---------------|------------------------|-------------------------|
| 1 | Clinicoradiographic markers of peri-implantitis in cigarette-smokers and never-smokers with type 2 Diabetes mellitus at 7-years follow-up                                                                               | Fawaz Alqahtani et al.     | 2020 | Not specified | J Periodontol          | Diabetes                |
| 2 | Comparison of clinical and radiographic parameters around short (6 to 8 mm in length) and long (11 mm in length) dental implants placed in patients with and without type 2 Diabetes mellitus: 3-year follow-up results | Mohammad D. Al Amri et al. | 2017 | Not specified | Clin Oral Implants Res | Diabetes                |
| 3 | Comparison of clinical and radiographic status of platform-switched implants placed in patients with and without type 2 Diabetes mellitus: a 24-month follow-up longitudinal study                                      | Mohammad D. Al Amri et al. | 2017 | Not specified | Clin Oral Implants Res | Diabetes                |
| 4 | Comparison of clinical and radiographic status around dental implants placed in patients with and without preDiabetes: 1-year follow-up outcomes                                                                        | Mohammad D. Al Amri et al. | 2017 | Not specified | Clin Oral Implants Res | Prediabetes             |
| 5 | Comparison of periodontal and peri-implant inflammatory parameters among patients with preDiabetes, type 2 Diabetes mellitus and non-diabetic controls                                                                  | Tariq Abduljabbar et al.   | 2017 | Not specified | Acta Odontol Scand     | Diabetes<br>Prediabetes |
